# Supplementary material
Source: PubMed Central journal article supplement (PMC2440942)
Supplement: 10549_2007_9732_MOESM1_ESM.pdf [file 10549_2007_9732_MOESM1_ESM.pdf]

1  
2  
3  
4 **APPENDIX**  
5

6 **Supplement Part I: HSQC metabolite identification and quantification**  
7

8  
9 Part I of this Supplement presents the 2D NMR data collected and analyzed from the  
10 MCF10 tumor progression model. A strength of this methodology is that we are able to  
11 identify and quantify a number of metabolites in each sample without prior separation.  
12  
13 Thus peak identification in the HSQC spectra is key as analysis depends upon extracting  
14 accurate signal volume and multiplet intensities from a spectrum of a mixture. Table S1  
15 lists the carbons observed for each metabolite and the corresponding multiplets and shifts  
16 in the proton and carbon dimensions. Table S2 shows the cross peak integration for the  
17  $^{13}\text{C}$  multiplet components. Table S3 displays the relative pool sizes of thirteen  
18 metabolites which were not explicitly presented in the main text.  
19  
20  
21  
22  
23  
24  
25  
26  
27  
28  
29  
30  
31  
32

33 The assignments of metabolites in the HSQC spectra were made according to published  
34 data, by comparison with spectra of authentic compounds, by spiking the samples and by  
35 observing the  $^{13}\text{C}$ - $^{13}\text{C}$  scalar coupling fine structures. Amino acids alanine, arginine,  
36 glycine, isoleucine, leucine, lysine, proline, and valine as well as lactate were readily  
37 identified. The cross peaks for succinate, taurine, *myo*-inositol, creatine and  
38 phosphocreatine were verified by recording the spectra of individual compounds.  
39  
40 Resonances of creatine and phosphocreatine can not be distinguished and thus represent  
41 the total creatine pool. Resonances of  $\gamma$ -glutamyl-glutathione (GSH), glutamine, choline,  
42 phosphocholine, glycerophosphocholine, *N*-acetyl-glucosamine (GlcNAc), *N*-acetyl-  
43 galactosamine (GalNAc), UDP-GlcNAc, and UDP-GalNAc were assigned using the  
44  
45  
46  
47  
48  
49  
50  
51  
52  
53  
54  
55  
56  
57  
58  
59  
60  
61  
62  
63  
64  
65

spiking method. The cross peaks for the acetyl group of UDP-GlcNAc and UDP-GalNAc are overlapped, and the acetyl moiety of GlcNAc and GalNAc is not resolved.

**Table S1.**  $^1\text{H}$  and  $^{13}\text{C}$  resonances from metabolites observed by HSCQ

| Serial no.         | Metabolites | Carbon position   | $^1\text{H}$ multiplet | $^{13}\text{C}$ multiplet | $^1\text{H}$ chemical shift (ppm) | $^{13}\text{C}$ chemical shift (ppm) |
|--------------------|-------------|-------------------|------------------------|---------------------------|-----------------------------------|--------------------------------------|
| <i>Amino acids</i> |             |                   |                        |                           |                                   |                                      |
| 1                  | Alanine     | C2                | q                      | m                         | 3.79                              | 53.24                                |
|                    |             | C3                | d                      | m                         | 1.49                              | 18.89                                |
| 2                  | Arginine    | C5                | t                      | s                         | 3.26                              | 43.26                                |
| 3                  | GSH (Glu)   | C3                | m                      | m                         | 2.18                              | 28.91                                |
|                    |             | C4                | t                      | m                         | 2.57                              | 34.14                                |
|                    | GSH (Cys)   | C2                | t                      | s                         | 4.58                              | 58.40                                |
|                    |             | C3                | m                      | s                         | 2.97                              | 28.25                                |
|                    |             | C2                | s                      | s / m                     | 3.79                              | 46.10                                |
| 4                  | Glutamate   | C2                | t                      | m                         | 3.79                              | 56.90                                |
|                    |             | C3                | m                      | m                         | 2.07, 2.13                        | 29.58                                |
|                    |             | C4                | t                      | m                         | 2.36                              | 36.22                                |
| 5                  | Glutamine   | C4                | m                      | m                         | 2.46                              | 33.56                                |
| 6                  | Glycine     | C2                | s                      | s / m                     | 3.57                              | 44.20                                |
| 7                  | Isoleucine  | C4-H <sub>3</sub> | d                      | s                         | 1.02                              | 17.39                                |
|                    |             | C5-H <sub>3</sub> | t                      | s                         | 0.95                              | 13.83                                |
| 8                  | Leucine     | C5                | d                      | s                         | 0.98                              | 24.75                                |
|                    |             | C5'               | d                      | s                         | 0.97                              | 23.67                                |

1  
2  
3  
4  
5  
6  
7  
8  
9  
10  
11  
12  
13  
14  
15  
16  
17  
18  
19  
20  
21  
22  
23  
24  
25  
26  
27  
28  
29  
30  
31  
32  
33  
34  
35  
36  
37  
38  
39  
40  
41  
42  
43  
44  
45  
46  
47  
48  
49  
50  
51  
52  
53  
54  
55  
56  
57  
58  
59  
60  
61  
62  
63  
64  
65

|                            |                           |                                               |    |       |            |       |
|----------------------------|---------------------------|-----------------------------------------------|----|-------|------------|-------|
| 9                          | Lysine                    | C5                                            | m  | s     | 1.74       | 29.12 |
|                            |                           | C6                                            | t  | s     | 3.02       | 41.95 |
| 10                         | Proline                   | C4                                            | m  | s / m | 2.02       | 26.49 |
|                            |                           | C5                                            | m  | s / m | 3.37, 3.44 | 48.85 |
| 11                         | Valine                    | C4                                            | d  | s     | 1.05       | 20.68 |
|                            |                           | C4'                                           | d  | s     | 1.00       | 19.39 |
| <i>Organic acids</i>       |                           |                                               |    |       |            |       |
| 12                         | Lactate                   | CH                                            | q  | m     | 4.12       | 71.22 |
|                            |                           | CH <sub>3</sub>                               | d  | m     | 1.33       | 22.78 |
| 13                         | Succinate                 | CH <sub>2</sub> -CH <sub>2</sub>              | s  | m     | 2.42       | 36.90 |
| <i>Sugars</i>              |                           |                                               |    |       |            |       |
| 14                         | <i>m</i> -Inositol        | C1H, C3H                                      | dd | s     | 3.55       | 73.87 |
|                            |                           | C2H                                           | t  | s     | 4.07       | 74.92 |
|                            |                           | C4H, C6H                                      | dd | s     | 3.63       | 75.15 |
|                            |                           | C5H                                           | t  | s     | 3.29       | 77.09 |
| 15                         | GlcNAc<br>/ GalNAc        | CH <sub>3</sub>                               | d  | m     | 2.01       | 24.62 |
| 16                         | UDP-GlcNAc<br>/UDP-GalNAc | CH <sub>3</sub>                               | d  | m     | 2.08       | 24.83 |
| <i>Membrane components</i> |                           |                                               |    |       |            |       |
| 17                         | Choline                   | CH <sub>2</sub> OH                            | m  | s     | 4.07       | 58.35 |
|                            |                           | NCH <sub>2</sub>                              | m  | s     | 3.52       | 70.17 |
| 18                         | Phosphocholine            | CH <sub>2</sub> -PO <sub>3</sub> <sup>-</sup> | m  | s     | 4.18       | 60.79 |
|                            |                           | NCH <sub>2</sub>                              | m  | s     | 3.60       | 69.23 |
|                            |                           | N(CH <sub>3</sub> ) <sub>3</sub>              | s  | s     | 3.23       | 56.75 |

1  
2  
3  
4  
5  
6  
7  
8  
9  
10  
11  
12  
13  
14  
15  
16  
17  
18  
19  
20  
21  
22  
23  
24  
25  
26  
27  
28  
29  
30  
31  
32  
33  
34  
35  
36  
37  
38  
39  
40  
41  
42  
43  
44  
45  
46  
47  
48  
49  
50  
51  
52  
53  
54  
55  
56  
57  
58  
59  
60  
61  
62  
63  
64  
65

|                        |                            |                                               |   |   |            |       |
|------------------------|----------------------------|-----------------------------------------------|---|---|------------|-------|
| 19                     | Glycero-<br>phosphocholine | CH <sub>2</sub> -PO <sub>3</sub> <sup>-</sup> | m | s | 4.33       | 62.17 |
|                        |                            | NCH <sub>2</sub>                              | m | s | 3.68       | 68.74 |
|                        |                            | CH <sub>2</sub> -O-P                          | m | m | 3.89, 3.95 | 69.25 |
|                        |                            | CHOH                                          | m | m | 3.91       | 73.38 |
|                        |                            | CH <sub>2</sub> OH                            | m | m | 3.62, 3.68 | 64.76 |
| <i>Nucleotides</i>     |                            |                                               |   |   |            |       |
| 20                     | UTP / UDP                  | C1H                                           | d | m | 6.00       | 91.14 |
|                        |                            | C2H                                           | t | m | 4.39       | 76.49 |
|                        |                            | C3H                                           | t | m | 4.38       | 72.39 |
|                        |                            | C4H                                           | t | m | 4.30       | 85.96 |
|                        |                            | C5H <sub>2</sub>                              | m | m | 4.24       | 67.89 |
| <i>Other compounds</i> |                            |                                               |   |   |            |       |
| 21                     | Creatine                   | CH <sub>2</sub>                               | s | s | 3.94       | 56.63 |
|                        |                            | CH <sub>3</sub>                               | s | s | 3.05       | 39.69 |
| 22                     | Taurine                    | N-CH <sub>2</sub>                             | t | s | 3.44       | 38.15 |
|                        |                            | S-CH <sub>2</sub>                             | t | s | 3.28       | 50.23 |

---

GSH, glutathione; GlcNAc, *N*-acetylglucosamine; GalNAc, *N*-acetylgalactosamine; s, singlet; d, doublet; t, triplet; q, quartet; m, multiplet.

<sup>13</sup>C multiplets were obtained based on [U-<sup>13</sup>C]glucose labeling and 2D [<sup>13</sup>C, <sup>1</sup>H] HSQC spectroscopy.

**Table S2.** Relative intensities of  $^{13}\text{C}$  multiplet components for metabolites observed by HSCQ

| Carbon position               | Isotopomer populations                             | Multiplet components | MCF-10A | MCF-10AT | MCF-10AT1 | MCF-10CA1a |
|-------------------------------|----------------------------------------------------|----------------------|---------|----------|-----------|------------|
| Alanine-C2                    | 2- $^{13}\text{C}$                                 | s                    | 0.27    | 0.20     | 0.19      | 0.15       |
|                               | 2,3- $^{13}\text{C}_2$                             | d                    | 0.01    | 0.13     | 0.15      | 0.12       |
|                               | 1,2- $^{13}\text{C}_2$                             | d*                   | 0.01    | 0.01     | 0.02      | 0.01       |
|                               | 1,2,3- $^{13}\text{C}_3$                           | dd                   | 0.71    | 0.66     | 0.64      | 0.72       |
| Alanine-C3                    | 3- $^{13}\text{C}$                                 | s                    | 0.28    | 0.21     | 0.22      | 0.18       |
|                               | 2,3- $^{13}\text{C}_2$                             | d                    | 0.72    | 0.79     | 0.78      | 0.82       |
| Lactate-C3                    | 3- $^{13}\text{C}$                                 | s                    | 0.16    | 0.21     | 0.22      | 0.14       |
|                               | 2,3- $^{13}\text{C}_2$                             | d                    | 0.84    | 0.79     | 0.78      | 0.86       |
| Acetyl-CoA (GlcNAc/GalNAc)-C2 | 2- $^{13}\text{C}$                                 | s                    | 0.29    | 0.23     | 0.22      | 0.24       |
|                               | 1,2- $^{13}\text{C}_2$                             | d                    | 0.71    | 0.77     | 0.78      | 0.76       |
| Glutamine-C4                  | 4- $^{13}\text{C}$                                 | s                    | 0.50    | 0.29     | 0.28      | 0.29       |
|                               | 3,4- $^{13}\text{C}_2$                             | d                    | 0.01    | 0.01     | 0.01      | 0.01       |
|                               | 4,5- $^{13}\text{C}_2$                             | d*                   | 0.48    | 0.67     | 0.68      | 0.67       |
|                               | 3,4,5- $^{13}\text{C}_3$                           | dd                   | 0.01    | 0.03     | 0.03      | 0.03       |
| Glutamate-C3                  | 3- $^{13}\text{C}$                                 | s                    | 0.73    | 0.65     | 0.64      | 0.59       |
|                               | 2,3- $^{13}\text{C}_2$ /<br>3,4- $^{13}\text{C}_2$ | d                    | 0.27    | 0.35     | 0.35      | 0.40       |
|                               | 2,3,4- $^{13}\text{C}_3$                           | t                    | 0       | 0        | 0.01      | 0.01       |
| Glutamate-C4                  | 4- $^{13}\text{C}$                                 | s                    | 0.50    | 0.21     | 0.32      | 0.30       |
|                               | 3,4- $^{13}\text{C}_2$                             | d                    | 0.01    | 0.01     | 0.01      | 0.01       |
|                               | 4,5- $^{13}\text{C}_2$                             | d*                   | 0.48    | 0.72     | 0.64      | 0.66       |

1  
2  
3  
4  
5  
6  
7  
8  
9  
10  
11  
12  
13  
14  
15  
16  
17  
18  
19  
20  
21  
22  
23  
24  
25  
26  
27  
28  
29  
30  
31  
32  
33  
34  
35  
36  
37  
38  
39  
40  
41  
42  
43  
44  
45  
46  
47  
48  
49  
50  
51  
52  
53  
54  
55  
56  
57  
58  
59  
60  
61  
62  
63  
64  
65

|              |                                                                          |    |      |      |      |      |
|--------------|--------------------------------------------------------------------------|----|------|------|------|------|
|              | 3,4,5- <sup>13</sup> C <sub>3</sub>                                      | dd | 0.01 | 0.06 | 0.03 | 0.03 |
| Glu (GSH)-C3 | 3- <sup>13</sup> C                                                       | s  | 0.67 | 0.58 | 0.55 | 0.53 |
|              | 2,3- <sup>13</sup> C <sub>2</sub> /<br>3,4- <sup>13</sup> C <sub>2</sub> | d  | 0.32 | 0.41 | 0.41 | 0.46 |
|              | 2,3,4- <sup>13</sup> C <sub>3</sub>                                      | t  | 0.01 | 0.01 | 0.04 | 0.01 |
| Glu (GSH)-C4 | 4- <sup>13</sup> C                                                       | s  | 0.24 | 0.12 | 0.13 | 0.14 |
|              | 3,4- <sup>13</sup> C <sub>2</sub>                                        | d  | 0.02 | 0.01 | 0.01 | 0.02 |
|              | 4,5- <sup>13</sup> C <sub>2</sub>                                        | d* | 0.70 | 0.77 | 0.76 | 0.75 |
|              | 3,4,5- <sup>13</sup> C <sub>3</sub>                                      | dd | 0.04 | 0.10 | 0.10 | 0.09 |
| Gly (GSH)-C2 | 2- <sup>13</sup> C                                                       | s  | 0.88 | 0.58 | 0.48 | 0.44 |
|              | 1,2- <sup>13</sup> C <sub>2</sub>                                        | d  | 0.12 | 0.42 | 0.52 | 0.56 |
| Glycine-C2   | 2- <sup>13</sup> C                                                       | s  | 0.86 | 0.57 | 0.48 | 0.44 |
|              | 1,2- <sup>13</sup> C <sub>2</sub>                                        | d  | 0.14 | 0.43 | 0.52 | 0.56 |
| Proline-C4   | 4- <sup>13</sup> C                                                       | s  | 1.00 | 1.00 | 1.00 | 0.42 |
|              | 4,5- <sup>13</sup> C <sub>2</sub>                                        | d  | 0.00 | 0.00 | 0.00 | 0.56 |
|              | 3,4,5- <sup>13</sup> C <sub>3</sub>                                      | t  | 0.00 | 0.00 | 0.00 | 0.02 |
| Proline-C5   | 5- <sup>13</sup> C                                                       | s  | 1.00 | 1.00 | 1.00 | 0.39 |
|              | 4,5- <sup>13</sup> C <sub>2</sub>                                        | d  | 0.00 | 0.00 | 0.00 | 0.61 |
| UDP-C2       | 2- <sup>13</sup> C                                                       | s  | 0.24 | 0.16 | 0.15 | 0.12 |
|              | 1,2- <sup>13</sup> C <sub>2</sub>                                        | d  | 0.62 | 0.58 | 0.59 | 0.59 |
|              | 1,2,3- <sup>13</sup> C <sub>3</sub>                                      | t  | 0.14 | 0.26 | 0.26 | 0.29 |

---

**Table S3.** Relative pool sizes of various metabolites<sup>a</sup>

| Metabolites                | Ratio<br>MCF-10AT /<br>MCF-10A | Ratio<br>MCF-10AT1 /<br>MCF-10A | Ratio<br>MCF-10CA1a /<br>MCF-10A |
|----------------------------|--------------------------------|---------------------------------|----------------------------------|
| (Glc + Gal)N <u>Ac</u>     | > 3.74 **                      | > 5.02 **                       | > 3.95 **                        |
| UDP-(Glc + Gal)N <u>Ac</u> | 3.60 ± 0.89 **                 | 3.29 ± 0.72 **                  | 2.55 ± 0.54 **                   |
| <i>m</i> -Inositol         | 0.61 ± 0.08 *                  | 0.71 ± 0.09 *                   | 0.38 ± 0.04 ***                  |
| Free choline               | 0.54 ± 0.09 *                  | 0.32 ± 0.05 **                  | < 0.07 ***                       |
| Phosphocholine             | 0.34 ± 0.05 **                 | 0.26 ± 0.03 ***                 | 0.23 ± 0.03 ***                  |
| Glycerophosphocholine      | < 0.07 ***                     | < 0.07 ***                      | < 0.03 ***                       |
| Arginine                   | 1.12 ± 0.17                    | 0.84 ± 0.13                     | 1.25 ± 0.18                      |
| Isoleucine                 | 0.88 ± 0.15                    | 0.71 ± 0.12                     | 0.85 ± 0.10                      |
| Leucine                    | 1.09 ± 0.11                    | 0.76 ± 0.10                     | 1.04 ± 0.10                      |
| Lysine                     | 1.04 ± 0.23                    | 0.69 ± 0.12                     | 0.96 ± 0.15                      |
| Valine                     | 0.91 ± 0.13                    | 0.66 ± 0.12                     | 0.83 ± 0.12                      |
| Creatine                   | 0.47 ± 0.04 **                 | 0.49 ± 0.05 **                  | 0.64 ± 0.06 **                   |
| Taurine                    | 0.31 ± 0.04 ***                | 0.26 ± 0.03 ***                 | 0.14 ± 0.02 ***                  |

<sup>a</sup> Relative amount of the compounds were obtained by normalizing the peak size to the response of internal reference compounds, and further, to 1 mg of total protein amount, and then by comparing with the results of MCF-10A sample. Quantitation based on natural isotopic abundance (a direct measure of metabolite concentrations). Values represent mean ± SD (*n*=4); \* indicates *P* < 0.05, \*\* *P* < 0.01, \*\*\* *P* < 0.001 for comparison to MCF10-A.

## Supplement Part II: Isotopomer analysis and modeling

$^{13}\text{C}$  tracer experiments and NMR spectroscopy provide a wealth of intuitive information on the cell intermediary metabolism. To account rigorously for this information, development of a mathematical model of cell metabolism is required. Comprehensive isotopomer models have been widely used for analysis of the metabolism in microorganism. Nevertheless, few models have been constructed for the metabolism in human cells or tissues. Here a mathematical model of human cell intermediary metabolism is developed. It describes the distribution of the  $^{13}\text{C}$  isotopomers of metabolites in cells fed with  $^{13}\text{C}$ -labeled substrates. The model allows the determination of fluxes through different metabolic pathways using the  $^{13}\text{C}$  multiplet pattern of various metabolites obtained from HSQC or  $^{13}\text{C}$ -NMR spectroscopy. The considered metabolic network includes glycolysis, the pentose phosphate pathway, the tricarboxylic acid cycle, anaplerotic reaction, and glycine and proline synthesis as follows. The model was used for calculating metabolic fluxes or flux ratios in a progression series of breast cancer cells, incubated with  $[\text{U-}^{13}\text{C}_6]\text{glucose}$ .

### *Contribution of Pentose Phosphate Pathway to Pyruvate and Ribose formation*

The relative flux of glucose carbons through glycolysis and the PPP to pyruvate relies on the analysis of  $^{13}\text{C}$  multiplets of alanine C2. The observed relative multiplet intensities were transformed to the relative abundances of intact carbon fragments. According to the carbon rearrangements that govern the PP pathway, the interconversion of three molecules pentose composed of intact C1-C2-C3-C4-C5 fragments eventually yields five molecules of pyruvate, three of which retain an intact C1-C2-C3 fragment, while two of



1  
2  
3  
4 them carry a C2-C3 fragment originating from a single glucose molecule but the C1-C2  
5  
6 carbon bonds have been cleaved. The latter fragments are denoted as fraction  $f^{(2)}\{\text{Ala-}$   
7  
8  $\text{C2}\}$ . The fraction of pyruvate derived from the PP pathway can then be estimated from  
9  
10 the expression  $5/2 * f^{(2)}\{\text{Ala-C2}\}$ . The fraction  $f^{(2)}\{\text{Ala-C2}\}$  is the main contributor to the  
11  
12 isotopomer population of  $[2,3-^{13}\text{C}_2]\text{alanine}$ , which is observed as the contribution of  
13  
14 doublet ( $^1J_{\text{CC}} = 35 \text{ Hz}$ ) to the total multiplets of alanine C2.  
15  
16  
17  
18  
19  
20

21 Ribose for nucleotides is synthesized directly from ribose-5-phosphate (R5P). R5P can  
22  
23 be synthesized via both the oxidative or non-oxidative branches of the PPP. To  
24  
25 determine the relative contributions of oxidative and non-oxidative PPP to R5P  
26  
27 production, the  $^{13}\text{C}$  scalar coupling multiplets of C2 of UTP or UDP were used to  
28  
29 calculate the relative abundances of intact carbon fragments in R5P. R5P formation  
30  
31 through oxidation of glucose-6-phosphate yields intact  $\text{C}_5$  fragments that is represented  
32  
33 by  $f^{(3)}(\text{UTP/UDP-C2})$ . However, if R5P is synthesized via the non-oxidative steps of PPP,  
34  
35 the reactions catalyzed by the reversible transketolase and transaldolase (EC 2.2.1.2)  
36  
37 lead to the cleavage of C2-C3 and C1-C2 connectivities in R5P, respectively. Therefore,  
38  
39 the relative contribution of non-oxidative PPP to R5P production can be estimated from  
40  
41 the sum of fractions  $f^{(1)}$  and  $f^{(2)}(\text{UTP/UDP-C2})$ .  
42  
43  
44  
45  
46  
47  
48  
49

### 50 *Anaplerotic Flux and TCA Cycle Flux*

51  
52 In the MCF10 cell lines, there are two points-of-entry for pyruvate into the TCA cycle,  
53  
54 pyruvate dehydrogenase (PDH) and pyruvate carboxylase (PC). (Entry via malic enzyme  
55  
56 is also possible but not observed in our system.) The entry of  $[\text{U-}^{13}\text{C}_3]\text{pyruvate}$  into the  
57  
58  
59  
60  
61  
62  
63  
64  
65

1  
2  
3  
4 TCA cycle through PDH or PC generates different labeling patterns of  $\alpha$ -ketoglutarate.  
5  
6 The relative abundances of these patterns are observed in glutamate labeling, a relatively  
7  
8 abundant compound in rapid equilibrium with the low abundance  $\alpha$ -ketoglutarate. TCA  
9  
10 cycle replenishment by [1,2- $^{13}\text{C}_2$ ]acetyl-CoA with the activity of pyruvate dehydrogenase  
11  
12 generates [4,5- $^{13}\text{C}_2$ ] $\alpha$ -ketoglutarate. Consequently, the isotopomer population of [4,5-  
13  
14  $^{13}\text{C}_2$ ]glutamate reflects the flux through pyruvate dehydrogenase, which equals the TCA  
15  
16 cycle (citrate synthase) flux when the acetyl-CoA synthetase flux is zero.  
17  
18  
19  
20  
21  
22

23  
24 However, if pyruvate enters the TCA cycle via pyruvate carboxylase then U-  
25  
26  $^{13}\text{C}_3$ ]pyruvate and unlabeled  $\text{CO}_2$  generate two  $^{13}\text{C}$  isotopomers of oxalacetate, [1,2,3-  
27  
28  $^{13}\text{C}_3$ ] and [2,3,4- $^{13}\text{C}_3$ ]oxaloacetate. Two isotopomers are formed because oxaloacetate is  
29  
30 reversibly converted into symmetric succinate (or fumarate). Thus [1,2,3- $^{13}\text{C}_3$ ] and [2,3-  
31  
32  $^{13}\text{C}_2$ ]glutamate is formed due to the activity of pyruvate carboxylase. The relative  
33  
34 activity of pyruvate carboxylase versus pyruvate dehydrogenase was calculated from the  
35  
36  $^{13}\text{C}$  multiplet components of glutamate at carbon positions C3 and C4:  $d\{\text{Glu-C3}\} /$   
37  
38  $(d^*\{\text{Glu-C4}\} + dd\{\text{Glu-C4}\})$ , where  $d\{\text{Glu-C3}\}$  is the contribution of doublet ( $^1J_{\text{CC}} = 35$   
39  
40 Hz) to the total multiplets of glutamate C3, and  $d^*\{\text{Glu-C4}\}$  and  $dd\{\text{Glu-C4}\}$  are the  
41  
42 relative contributions of the doublet with  $^1J_{\text{CC}}$  coupling constant of 55 Hz and the  
43  
44 doublet-of-doublets to the glutamate C4 multiplets, respectively.  
45  
46  
47  
48  
49  
50  
51  
52

53 Based on the analysis of the  $^{13}\text{C}$  multiplets of acetyl-CoA C2, glutamate C4, and C4 of  $\gamma$ -  
54  
55 glutamyl moiety of glutathione, we found that the C4 and C5 of  $\gamma$ -glutamyl of glutathione  
56  
57 are solely derived from acetyl-CoA, whereas an isotopic dilution originating from a non-  
58  
59  
60  
61  
62  
63  
64  
65

enriched carbon source occurred to glutamate. Hence, the  $^{13}\text{C}$  multiplet pattern of  $\gamma$ -glutamyl moiety of glutathione was used to determine the relative activity of the anaplerotic pathway and the TCA cycle. In metabolic steady-state, the anaplerotic flux equals the flux of removal of TCA cycle intermediates towards cell synthesis.

### *Glycine Biosynthesis*

Glycine could be synthesized via serine from an intermediate of glycolysis, 3-phosphoglycerate, or obtained directly from media components. Due to the absence of the isotopomer population of  $[1,2-^{13}\text{C}_2]$ alanine, we determined that no backflow from the TCA cycle to glycolysis (e.g. the conversion of malate to pyruvate catalyzed by malic enzyme) occurred. Therefore all the  $\text{C}_3$  intermediates of glycolysis have the same isotopomer distribution and thus the labeling state of 3-phosphoglycerate is equivalent to that of pyruvate, which is assessed via alanine.

We obtain the isotopomer balance equation (SE1).

$$P_{Gly-C2} \cdot \begin{bmatrix} s \\ d \end{bmatrix}_{Gly-C2} = X^{syn} \cdot P_{Ala-C2} \cdot \begin{bmatrix} s + d \\ d^* + q \end{bmatrix}_{Ala-C2} + (1 - X^{syn}) \cdot P_n \cdot \begin{bmatrix} 1 - P_n \\ P_n \end{bmatrix} \quad (\text{SE1})$$

In this equation,  $X^{syn}$  represents the fraction of glycine derived from glycolysis,  $s$ ,  $d$ ,  $d^*$ , and  $q$  correspond to the relative contributions of singlet, doublet, doublet with a larger coupling constant and quartet, respectively.  $P_n$  is the natural  $^{13}\text{C}$  abundance ( $P_n = 0.011$ ), and  $P_{Gly-C2}$  and  $P_{Ala-C2}$  are the specific enrichments of glycine C2 and alanine C2.  $P_{Gly-C2}$  can be calculated from  $X^{syn}$ ,  $P_n$  and  $P_{Ala-C2}$  using the relation  $P_{Gly-C2} = X^{syn} \cdot P_{Ala-C2} + (1 -$

1  
2  
3  
4  $X^{syn}) \cdot P_n$ , thus  $X^{syn}$  is determined from the  $^{13}\text{C}$  multiplets of alanine C2 and glycine C2  
5  
6  
7 with Eq. (SE2).

$$X^{syn} = \frac{P_n \cdot \left( \begin{array}{c} \left[ \begin{array}{c} s \\ d \end{array} \right]_{Gly-C2} - \left[ \begin{array}{c} 1-P_n \\ P_n \end{array} \right] \end{array} \right)}{P_{Ala-C2} \cdot \left( \begin{array}{c} \left[ \begin{array}{c} s+d \\ d^*+q \end{array} \right]_{Ala-C2} - \left[ \begin{array}{c} s \\ d \end{array} \right]_{Gly-C2} \end{array} \right) + P_n \cdot \left( \begin{array}{c} \left[ \begin{array}{c} s \\ d \end{array} \right]_{Gly-C2} - \left[ \begin{array}{c} 1-P_n \\ P_n \end{array} \right] \end{array} \right)} \quad (SE2)$$

### 21 *Proline Biosynthesis*

22  
23  
24 Proline could be synthesized via glutamate from glucose, or obtained directly from media  
25  
26 components. The equation for calculating proline biosynthesis is derived similarly to that  
27  
28 of glycine biosynthesis. Thus the fraction of proline derived from glucose,  $X^{syn}$ , was  
29  
30 determined from the  $^{13}\text{C}$  multiplets of glutamate C4 and proline C4 using Eq. (SE3).

$$X^{syn} = \frac{P_n \cdot \left( \begin{array}{c} \left[ \begin{array}{c} s \\ d \\ t \end{array} \right]_{Pro-C4} - \left[ \begin{array}{c} (1-P_n)^2 \\ 2 \cdot (1-P_n) \cdot P_n \\ P_n^2 \end{array} \right] \end{array} \right)}{P_{Glu-C4} \cdot \left( \begin{array}{c} \left[ \begin{array}{c} s \\ d+d^* \\ q \end{array} \right]_{Glu-C4} - \left[ \begin{array}{c} s \\ d \\ t \end{array} \right]_{Pro-C4} \end{array} \right) + P_n \cdot \left( \begin{array}{c} \left[ \begin{array}{c} s \\ d \\ t \end{array} \right]_{Pro-C4} - \left[ \begin{array}{c} (1-P_n)^2 \\ 2 \cdot (1-P_n) \cdot P_n \\ P_n^2 \end{array} \right] \end{array} \right)} \quad (SE3)$$

31  
32  
33  
34  
35  
36  
37  
38  
39  
40  
41  
42  
43  
44  
45  
46  
47  
48  
49  
50  
51 In this equation,  $P_{Glu-C4}$  is the specific enrichment of glutamate C4,  $s$ ,  $d$ ,  $d^*$ ,  $t$ ,  $q$   
52  
53 correspond to the relative contributions of singlet, doublet, doublet with a larger coupling  
54  
55 constant, triplet, and quartet, respectively.  
56  
57  
58  
59  
60  
61  
62  
63  
64  
65
